# Supplementary material for: Inhibition of protein kinase C enhances angiogenesis induced by platelet-derived growth factor C in hyperglycemic endothelial cells
Source: Springer Nature journal article supplement (doi:10.1186/s12933-015-0180-9), 2015-01-01

Supplemental figure 3

A

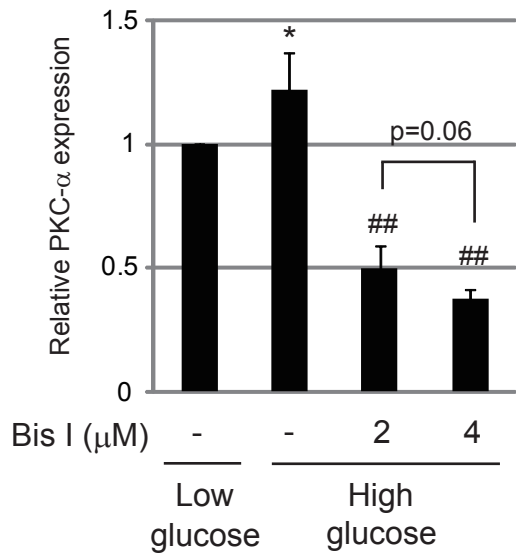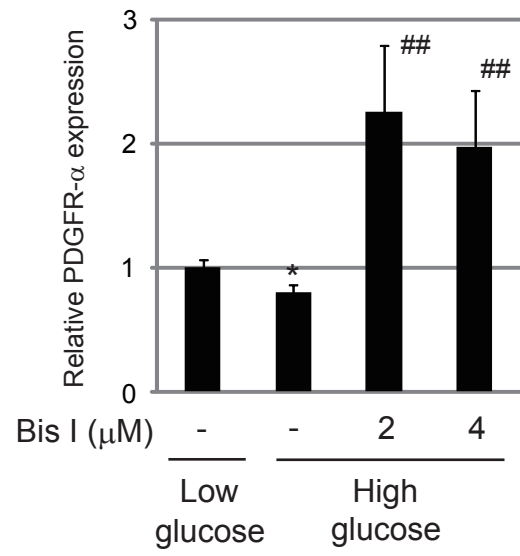

B

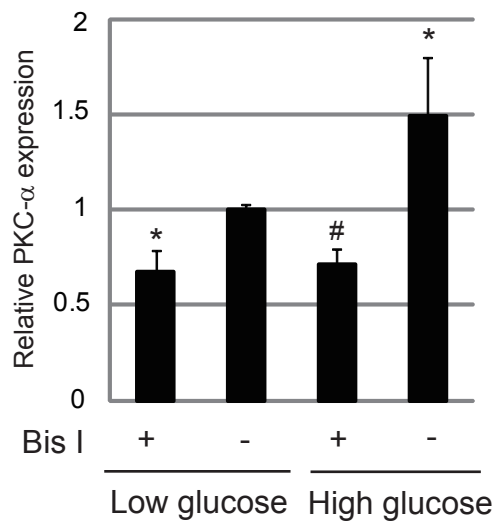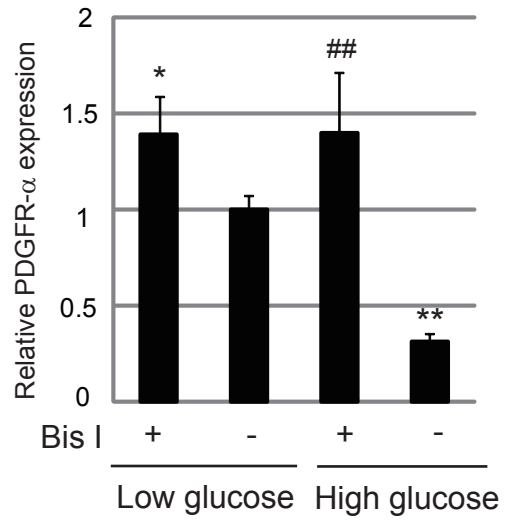

Supplement: MOESM3 [file 9760090]
